# Supplementary figures and images for: Residues 762–801 of PLD1 mediate the interaction with PED/PEA15
Source: Royal Society of Chemistry journal article supplement (doi:10.1039/c005272h), 2010-08-11

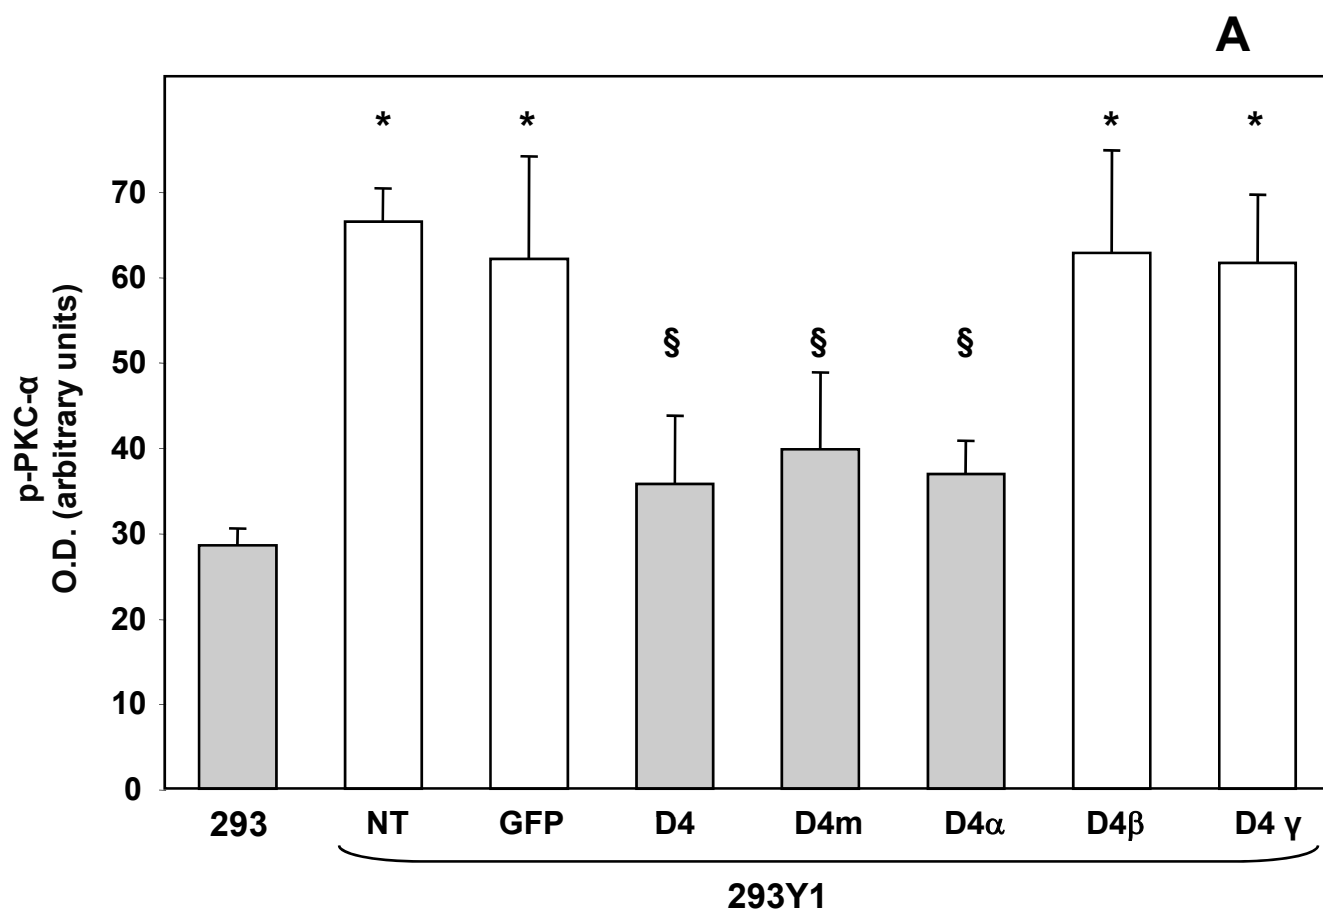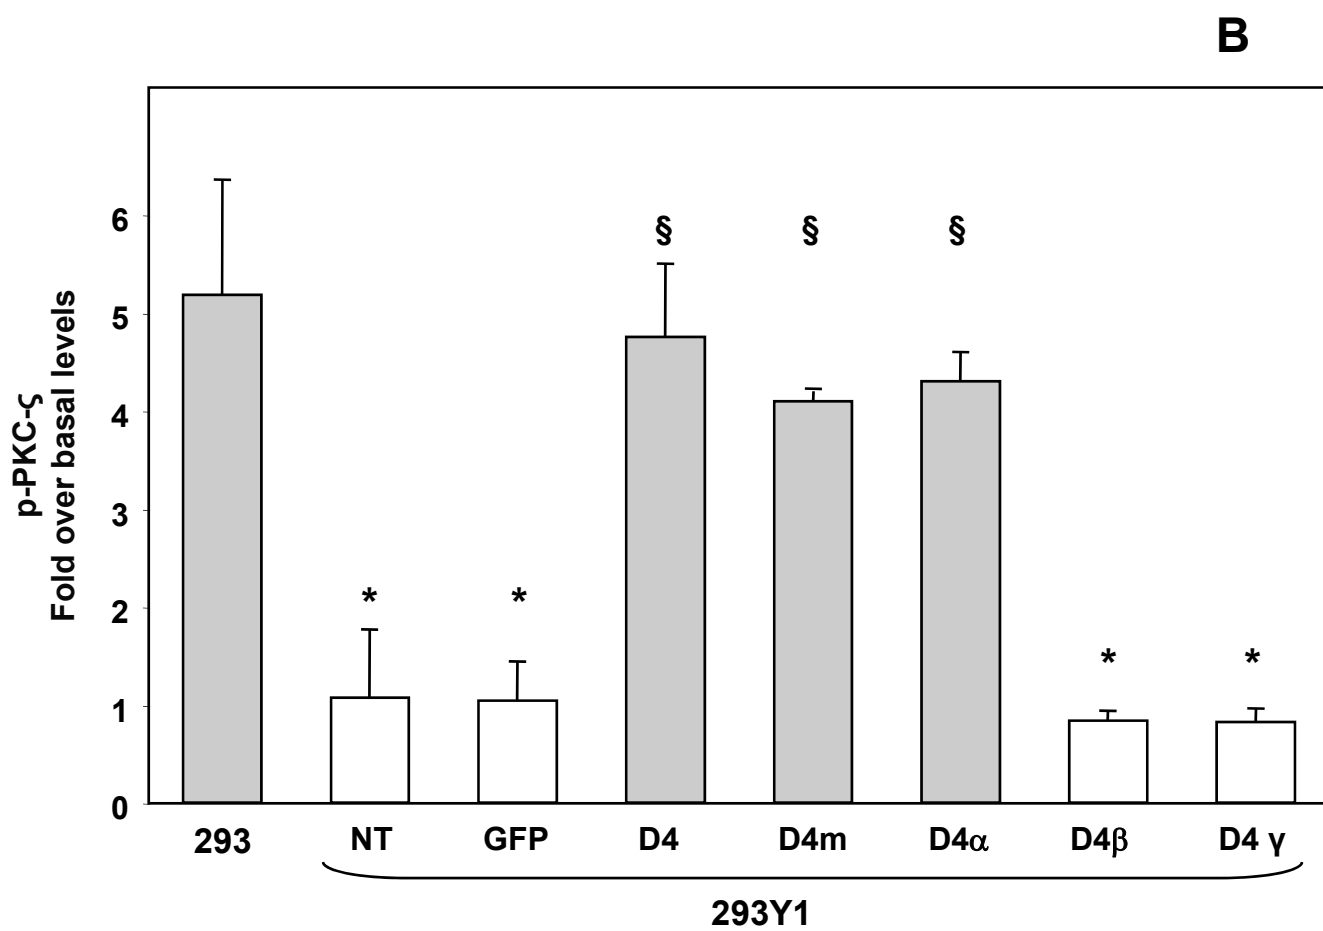

**Figure S2**

Supplement: c005272h.pdf [file c005272h.pdf]
